# Supplementary material
Source: ML conference proceedings conference paper supplement (https://openreview.net/forum?id=5WoYFypPv0)
Supplement: supplementary_material [file attachment]

## A Societal Impacts

Our paper is closely related to Responsible AI (RAI), especially in enabling qualitative assessments of models. Our approach provides visual and intuitive explanations of a model’s decision-making criteria, offering insights that are both explanatory and responsible. Our approach of utilizing DSVs for RAI enables global explanations, surpassing traditional Explainable AI (XAI) methodologies, which usually focus on local explanations for individual inputs and cannot provide a global decision criterion. Furthermore, since our method is based on model inversion, it ensures safety and privacy. While the synthesized sets in Fig. 7 might appear similar to the selected sets, they do not replicate specific sample features. This is because DSVs represent a more generalized decision boundary, avoiding the inclusion of image-specific features. Consequently, DSVs enable all models using logistic loss to be more responsible.

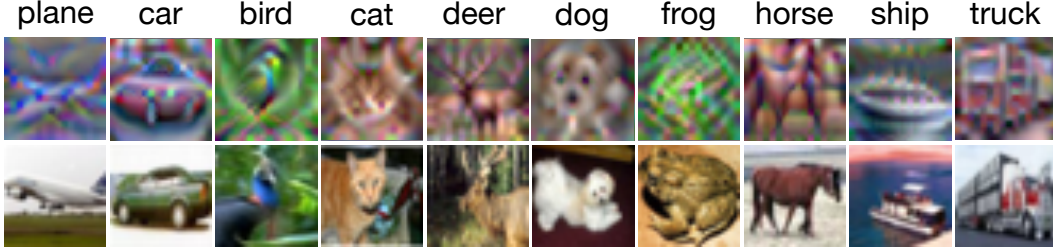

Figure 7: Comparison of synthesized images (first row) created using the DeepKKT condition initiated from noise, and selected images (second row) from the CIFAR-10 training dataset. The selected images were chosen based on  $\lambda$  values, *i.e.*, each image has the highest  $\lambda$  in each class. Both synthesized and selected images demonstrate similarity at the pixel level sharing common features.

## B Limitations and Future work

In this paper, we propose the DeepKKT condition, which can be applied universally to any deep models to generate deep support vectors (DSVs) that function similarly to support vectors in SVMs. However, it should be noted that the equivalence between DSVs in deep learning models and support vectors in SVMs is only described intuitively, not rigorously. We have shown experimentally in Fig. 7 and intuitively in Sec. C why the DeepKKT condition should be as we suggested, but we have not derived it with rigorous math. Proving this rigorously would be a meaningful research topic.

## C Intuitive explanation of DeepKKT condition

In DeepKKT, many conditions make sense, except for one. For instance, the primal feasibility condition and the manifold condition are reasonable, and the dual feasibility condition can be regarded as importance sampling. However, the most counterintuitive part is the stationarity condition:

$$L_{\text{stat}} = D(\theta^*, -\sum_{i=1}^n \lambda_i \nabla_{\theta} L(\Phi(x_i; \theta^*), y_i)) \quad (12)$$

In this section, we will explain the dynamics of DSVs in an overparameterized deep network and how it is connected to deep learning. Below is a quick analogy of [28] to illustrate this connection.

A deep learning model follows the following ODE:

$$w_{t+1} = w_t - \eta \nabla L(x, y; w_t). \quad (13)$$

Here,  $\eta$  is the learning rate and  $t$  is the optimization step. The loss  $L$  does not go to zero since deep learning models usually exploit a loss function with a logistic tail, such as the cross-entropy loss, and the gradient of the least confident sample (support vector) dominates overall gradient. Thus, there exists a convergence of the gradient direction  $g_{\infty} := \hat{\nabla} L$ . There also exists a time  $T$  where the

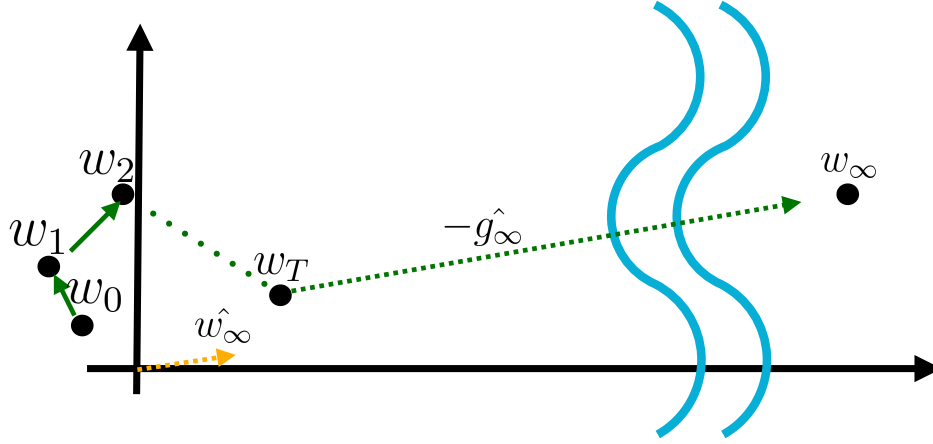

Figure 8: The stationarity condition with a logistic loss. Even though the direction of the gradient  $\hat{g}$  converges, the size of the gradient does not go to zero. Therefore, the direction of the converged gradient weight  $\hat{w}_\infty$  aligns with  $\hat{g}$ .

gradient direction converges to  $g_\infty - \varepsilon$  for a sufficiently small  $\varepsilon$ . As illustrated in Fig. 8,  $w$  moves toward the direction of  $-g_\infty$ . Therefore,  $\hat{w}_\infty \approx -g_\infty$ .

This is for what stationarity condition wants to seek. The direction of  $g_\infty$ , by using only a few support vectors.

## D Implementation Details

To obtain the results in Table 2 and Fig. 4, the ConvNet architecture [5] was used for pretraining  $\Phi(\cdot; \theta)$  on the SVHN dataset [20], a digit dataset with dimensions similar to CIFAR-10 [11]. For ImageNet, we used the ResNet50 model [7] with the original setting in the paper. Specifically, we used the pretrained model in torchvision library in pytorch [22]. For visualizing synthesized DSVs in ImageNet, we increased the contrast in 224x224 dimensions. When calculating  $L_{\text{stat}}$ , we averaged the distance per parameter. In Alg. 1,  $\eta$  was set to 5.

To synthesize DSVs in ImageNet, we used translation, crop, cutout, flip, and noise for augmentation, with hyperparameters set to 0.125, 0.2, 0.15, 0.5, and 0.01, respectively. In Eq. (9), we set  $\alpha$  to  $2e-5$ ,  $\beta$  to 40, and  $\gamma$  to  $1e-6$ . When calculating  $L_{\text{stationarity}}$ , we averaged the distance per parameter.

For dataset distillation in Table 2, we used translation, crop, flip, and noise for augmentation, with hyperparameters set to 0.125, 0.2, and 0.5, respectively. In Eq. (9), we set  $\alpha$  to  $2e-3$ , and both  $\beta$  and  $\gamma$  to 0. For retraining models with synthesized images, we used a learning rate of  $1e-4$  while the other parameters set to the default values of the Adam optimizer [9].

To obtain the pretrained weight  $\theta^*$  for CIFAR10 and CIFAR100, we chose the ConvNet architecture [5], a common choice in deep learning. This architecture includes sequential convolutional layers followed by max pooling, and a single fully-connected layer for classification. The learning rate was set to  $10^{-3}$  with a weight decay of 0.005 using the Adam optimizer. Additionally, we employed flipping and cropping techniques, with settings differing from those used for DSVs reconstruction to ensure fair comparison. For pretraining  $\Phi$  on the Street View House Numbers (SVHN) dataset [20], a digit dataset with dimensions similar to CIFAR-10 [11], we exclusively trained the fully-connected layer of the CIFAR-10 pre-trained ConvNet. This approach resulted in a training accuracy of 80%.

## E DSVs by Selection

Fig. 9 shows the selected images with large Lagrangian multipliers  $\lambda$ 's, which correspond to the candidates used in Fig. 2b. Surprisingly, there is a meaningful match between the selected DSVs and the synthesized DSVs in the CIFAR-10 dataset, as shown in Fig. 7. This implies that synthesizing DSVs corresponds to reviving training data that lie on the boundary manifolds.

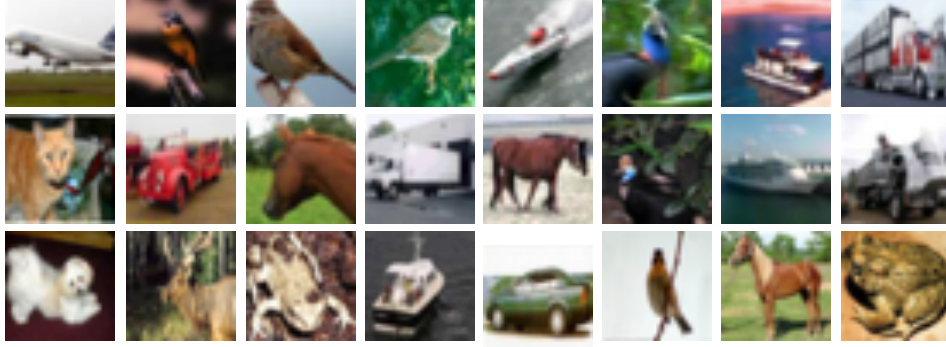

Figure 9: Images of DSV candidates (Selected in the CIFAR-10 dataset).

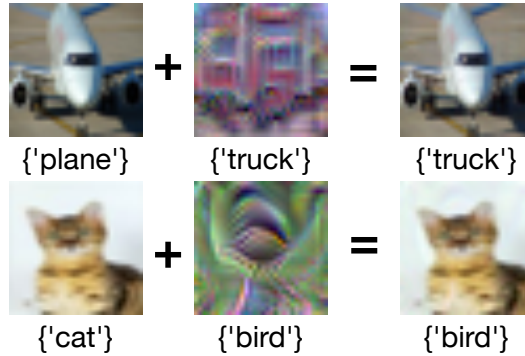

Figure 10: Examples of adversarial attack in the CIFAR-10 dataset

## 496 F More Characteristics of DSVs

497 **DSVs Are Full of Discriminative Information** In Fig. 10 we conducted an experiment by mixing  
 498 a randomly sampled image from the real dataset with an image from the DSVs. Upon observation,  
 499 the mixed image is virtually indistinguishable from an image obtained solely from the real dataset.  
 500 It is noteworthy to highlight this situation resembles that of an adversarial attack [32, 19], yet  
 501 we did not apply gradient descent to the image; we simply mixed two images. This suggests that  
 502 the discriminative informational density in a single DSV image is substantially greater than that  
 503 in a randomly sampled image. The fact that the DSV’s characteristics remained dominant in the  
 504 classification, underscores the significant role of DSVs in explaining the model’s classification ability.

## 505 G More Examples

506 In Fig. 11, examples of latent interpolations between target labels are presented. The smoothness  
 507 of these interpolations within the latent space indicates that the semantic information learned from  
 508 the training data has been effectively applied during the DSV generation process. This observation  
 509 provides evidence that the DeepKKT optimization successfully conducts the generative process.

510 Fig. 12 and 13 provide examples of deep support vectors generated using the CIFAR-100 and  
 511 ImageNet datasets, respectively. Fig. 14 presents additional examples related to image editing.

512 Fig. 15 empirically supports on our assertion on decision criterion. Starting from CIFAR100 random  
 513 images and CIFAR10-pretrained models, we edited the image CIFAR10 labels as latents. The edited  
 514 images changes the image following decision criterions in generated DSVs. 1) For editing images to  
 515 deer, antler grows. 2) For dog editing, facial dots are generated. 3) For cat editing, pointed triangler  
 516 features are generated.

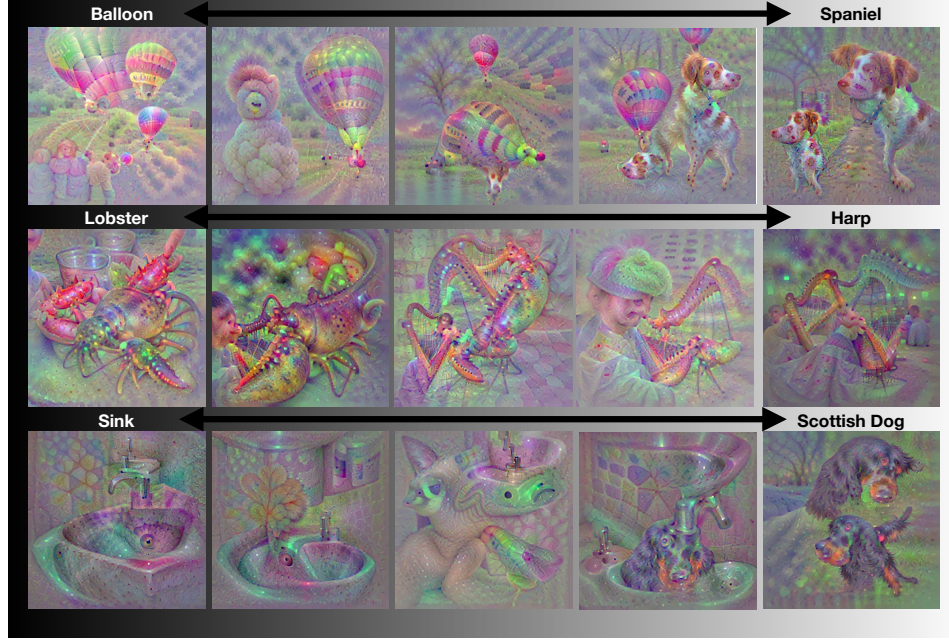

Figure 11: More examples of latent interpolation in the ImageNet dataset

## 517 H Algorithm

518 Alg. 1 presents our algorithm of generating Deep Support Vectors (DSVs). Initialized either from a  
 519 noise  $x_i^s \sim \mathcal{N}(0, I)$  or a real sample, it iterates to obtain the primal  $X^S$  and dual  $\Lambda^S$  variables.

---

### Algorithm 1 Support Vector Refinement for Deep Learning Model

---

**Require:** Pretrained classifier  $\Phi(\cdot; \theta)$ , loss function  $L$ , augmentation function set  $A$ , number of DSV candidate  $N$ , number of class  $C$ , hyperparameters  $\alpha, \beta$

**Ensure:** Freeze classifier  $\Phi(\cdot; \theta)$

- 1: Initialize  $N \times C$  number of support vector candidates
  - 2: **for**  $i = 1$  to  $C$  **do**
  - 3:   sample  $N$  number of  $(x_i^s, \lambda_i^s)$  for label  $y_i^s = i$
  - 4: **end for**
  - 5: Define  $X^S = \{x_i^s \mid i \in [C], s \in [N]\}$
  - 6: Define  $\Lambda^S = \{\lambda_i^s \mid i \in [C], s \in [N]\}$
  - 7: **repeat**
  - 8:    $L_{\text{primal}}(X^S) = \sum_{s=1}^N \sum_{i=1}^C L(\Phi(x_i^s; \theta), y_i^s)$
  - 9:    $L_{\text{stationary}}(X^S) = \|\theta + \sum_{s=1}^N \sum_{i=1}^C \lambda_i^s y_i^s \nabla_{\theta} \Phi(x_i^s; \theta)\|_2^2$
  - 10:    $L_{\text{kkt}}(X^S) = \beta_1 \cdot L_{\text{primal}}(X^S) + L_{\text{stationary}}(X^S)$
  - 11:    $L_{\text{prior}} = \beta_2 \cdot L_{\text{tot}}(X) + \beta_3 L_{\text{norm}}(X)$
  - 12:   Sample  $f_A \in A$
  - 13:   Define  $AX^S = \{f_A(x_i^s) \mid x_i^s \in X^S\}$
  - 14:    $L_{\text{akkt}}(X^S) = L_{\text{kkt}}(AX^S)$
  - 15:    $L_{\text{total}}(X^S) = L_{\text{kkt}}(X^S) + \eta \cdot L_{\text{akkt}}(X^S) + L_{\text{prior}}$
  - 16:   Update  $X^S \leftarrow X^S + \nabla_{X^S} L_{\text{total}}(X^S)$
  - 17:   Update  $\Lambda^S \leftarrow \Lambda^S + \nabla_{\Lambda^S} L_{\text{total}}(X^S)$
  - 18:   Remove  $x_i^s$ s for corresponding  $\lambda_i^s < 0$
  - 19: **until**  $X^S$  converges
  - 20: **return** Set of DSV :  $X^S$
-

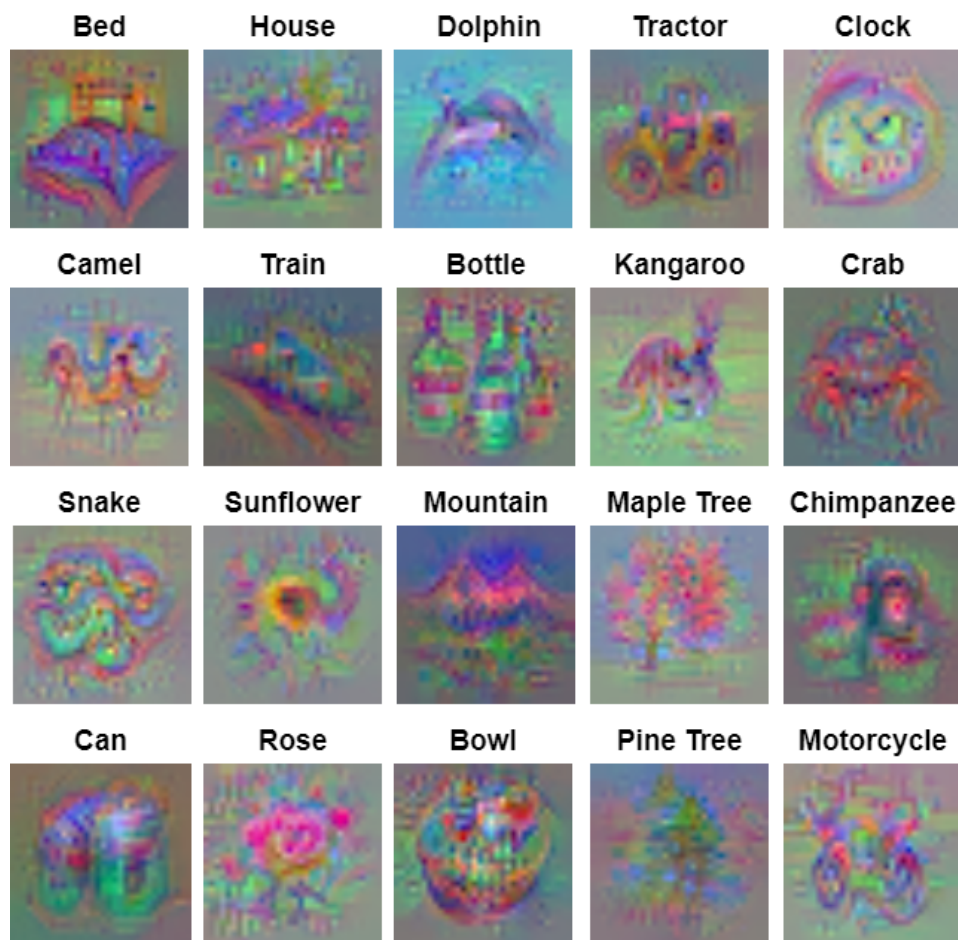

Figure 12: More examples of generated images with CIFAR-100 dataset



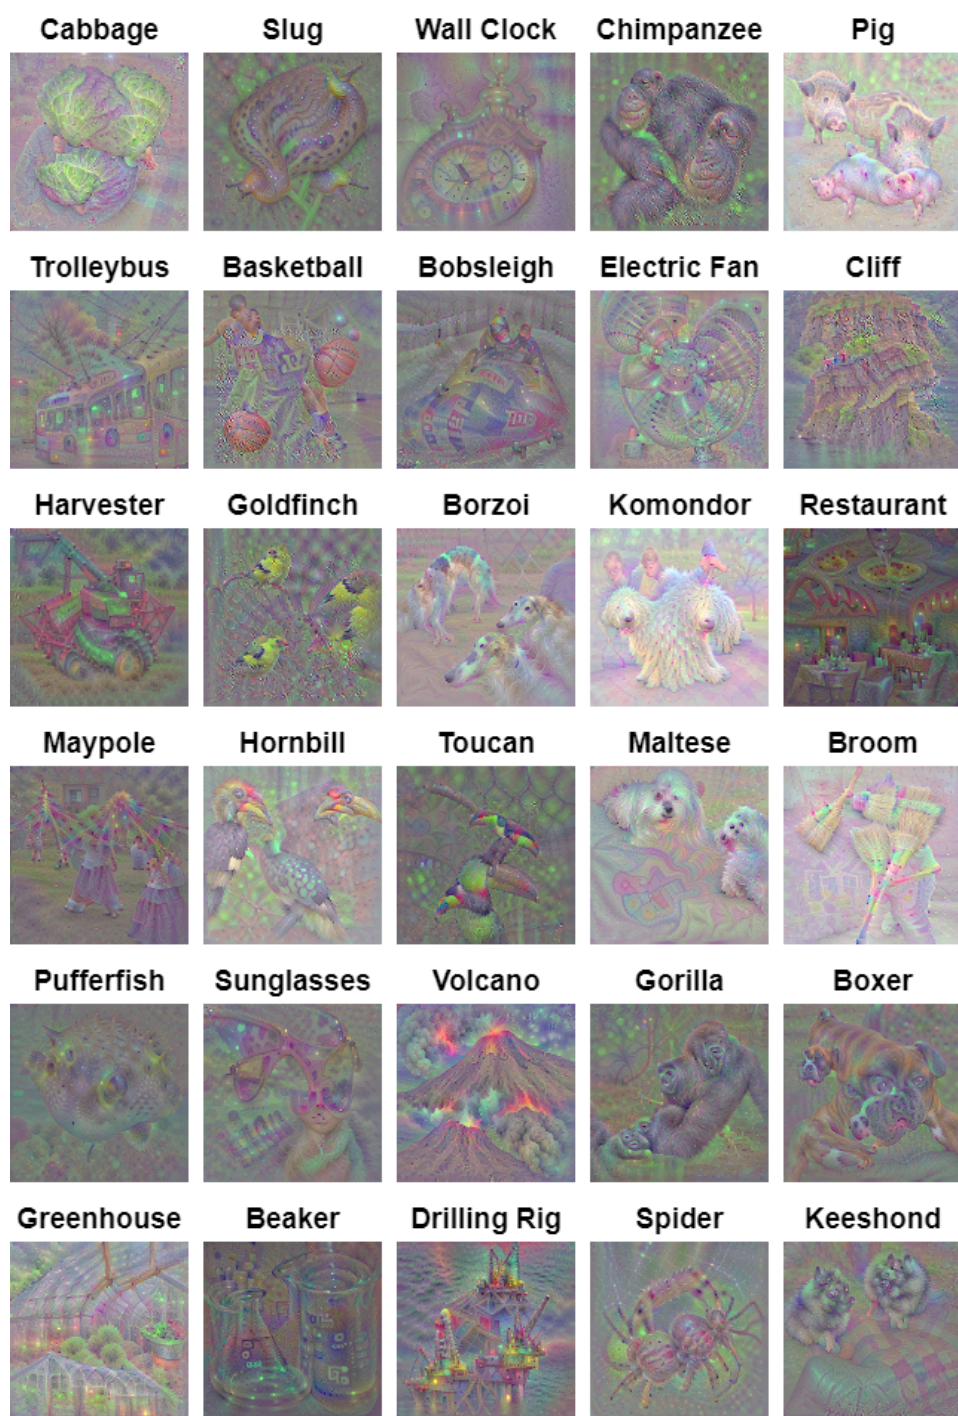

Figure 13: More examples of generated images with ImageNet dataset

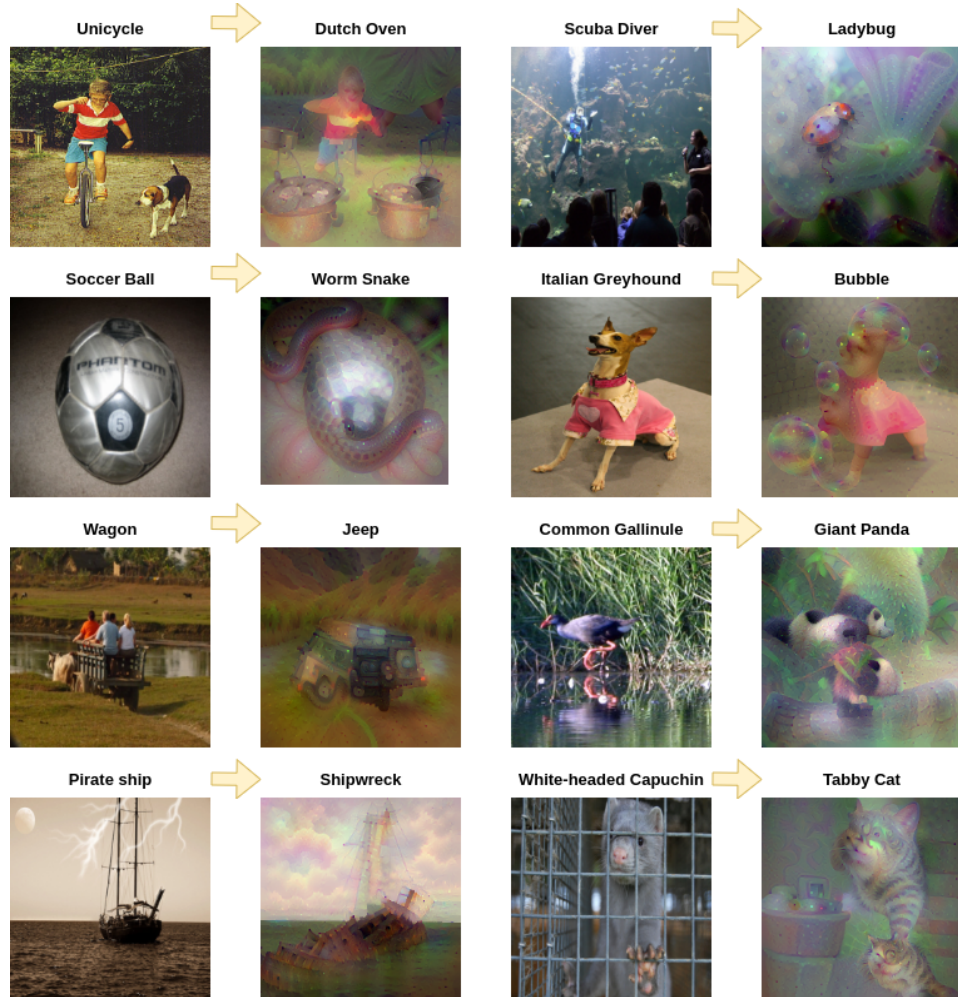

Figure 14: More examples of image editing. The images to the left of the arrows represent the initial images before training, while those to the right depict the edited images after training.

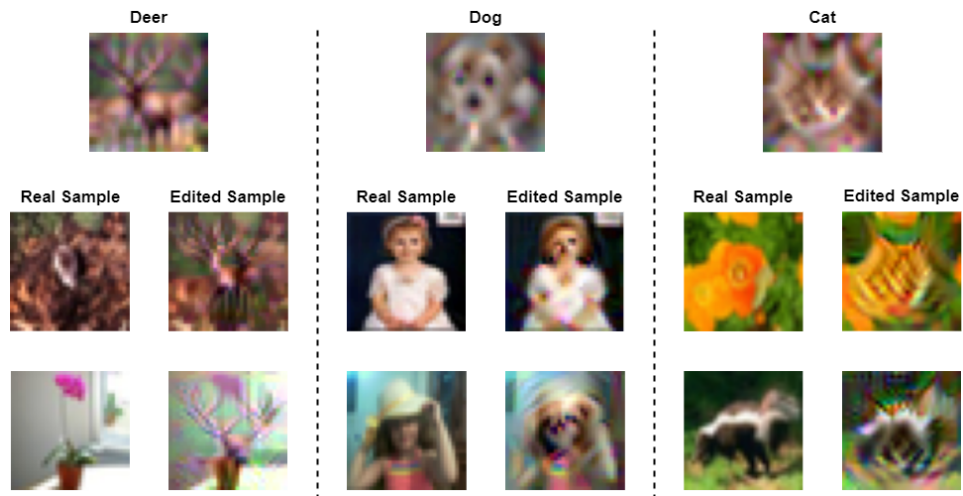

Figure 15: More examples of image editing. The images to the left of the arrows represent the initial images before training, while those to the right depict the edited images after training.

## 520 **NeurIPS Paper Checklist**

### 521 **1. Claims**

522 Question: Do the main claims made in the abstract and introduction accurately reflect the  
523 paper’s contributions and scope?

524 Answer: [\[Yes\]](#)

525 Justification: Introduction and abstract effectively explains the paper’s contributions and  
526 scope

### 527 **2. Limitations**

528 Question: Does the paper discuss the limitations of the work performed by the authors?

529 Answer: [\[Yes\]](#)

530 Justification: See sec [B](#)

### 531 **3. Theory Assumptions and Proofs**

532 Question: For each theoretical result, does the paper provide the full set of assumptions and  
533 a complete (and correct) proof?

534 Answer: [\[NA\]](#)

535 Justification: There are no theorems or lemma in this paper.

### 536 **4. Experimental Result Reproducibility**

537 Question: Does the paper fully disclose all the information needed to reproduce the main ex-  
538 perimental results of the paper to the extent that it affects the main claims and/or conclusions  
539 of the paper (regardless of whether the code and data are provided or not)?

540 Answer: [\[Yes\]](#)

541 Justification: We provide code

### 542 **5. Open access to data and code**

543 Question: Does the paper provide open access to the data and code, with sufficient instruc-  
544 tions to faithfully reproduce the main experimental results, as described in supplemental  
545 material?

546 Answer: [\[Yes\]](#)

547 Justification: We provide code and its setting

### 548 **6. Experimental Setting/Details**

549 Question: Does the paper specify all the training and test details (e.g., data splits, hyper-  
550 parameters, how they were chosen, type of optimizer, etc.) necessary to understand the  
551 results?

552 Answer: [\[Yes\]](#)

553 Justification: Yes, we leave full details in Sec ??

### 554 **7. Experiment Statistical Significance**

555 Question: Does the paper report error bars suitably and correctly defined or other appropriate  
556 information about the statistical significance of the experiments?

557 Answer: [\[Yes\]](#)

558 Justification: Yes, we offer standard deviation.

### 559 **8. Experiments Compute Resources**

560 Question: For each experiment, does the paper provide sufficient information on the computer  
561 resources (type of compute workers, memory, time of execution) needed to reproduce the  
562 experiments?

563 Answer: [\[Yes\]](#)

564 Justification: Yes, see Sec [D](#)

### 565 **9. Code Of Ethics**



566 Question: Does the research conducted in the paper conform, in every respect, with the  
 567 NeurIPS Code of Ethics <https://neurips.cc/public/EthicsGuidelines?>  
 568 Answer: [Yes]  
 569 Justification:

570 **10. Broader Impacts**

571 Question: Does the paper discuss both potential positive societal impacts and negative  
 572 societal impacts of the work performed?  
 573 Answer: [Yes]  
 574 Justification: See Sec. **A**

575 **11. Safeguards**

576 Question: Does the paper describe safeguards that have been put in place for responsible  
 577 release of data or models that have a high risk for misuse (e.g., pretrained language models,  
 578 image generators, or scraped datasets)?  
 579 Answer: [NA]  
 580 Justification:

581 **12. Licenses for existing assets**

582 Question: Are the creators or original owners of assets (e.g., code, data, models), used in  
 583 the paper, properly credited and are the license and terms of use explicitly mentioned and  
 584 properly respected?  
 585 Answer: [Yes]  
 586 Justification: We explained used library and environments with citations

587 **13. New Assets**

588 Question: Are new assets introduced in the paper well documented and is the documentation  
 589 provided alongside the assets?  
 590 Answer: [NA]  
 591 Justification:

592 **14. Crowdsourcing and Research with Human Subjects**

593 Question: For crowdsourcing experiments and research with human subjects, does the paper  
 594 include the full text of instructions given to participants and screenshots, if applicable, as  
 595 well as details about compensation (if any)?  
 596 Answer: [NA]  
 597 Justification:

598 **15. Institutional Review Board (IRB) Approvals or Equivalent for Research with Human**  
 599 **Subjects**

600 Question: Does the paper describe potential risks incurred by study participants, whether  
 601 such risks were disclosed to the subjects, and whether Institutional Review Board (IRB)  
 602 approvals (or an equivalent approval/review based on the requirements of your country or  
 603 institution) were obtained?  
 604 Answer: [NA]  
 605 Justification:
